# Supplementary material
Source: PubMed Central journal article supplement (PMC5280004)
Supplement: ASN.2015080910SupplementaryData.pdf [file ASN.2015080910SupplementaryData.pdf]

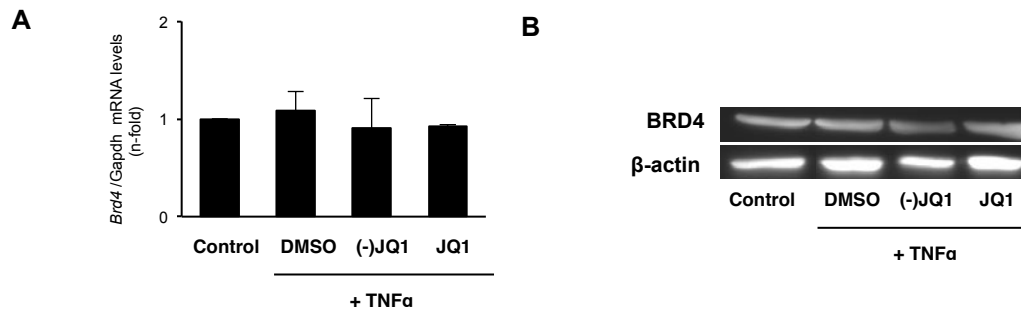

**Figure 1 Supplementary. JQ1 did not modify BRD4 gene and protein levels in cultured renal cells.** Renal tubular epithelial cells (HK2 cell line) were preincubated with vehicle (DMSO), JQ1 or the non-active control (-)JQ1 (both at 500 nM) for 1 hour, and then cells were stimulated with TNF- $\alpha$  (5 ng/ml) for 3 hours **A**. Gene (real-time qPCR) or **(B)** protein (western blot) expression of BRD4 of two experiments are shown. GAPDH and  $\beta$ -actin were used for normalization and as a loading control, respectively.

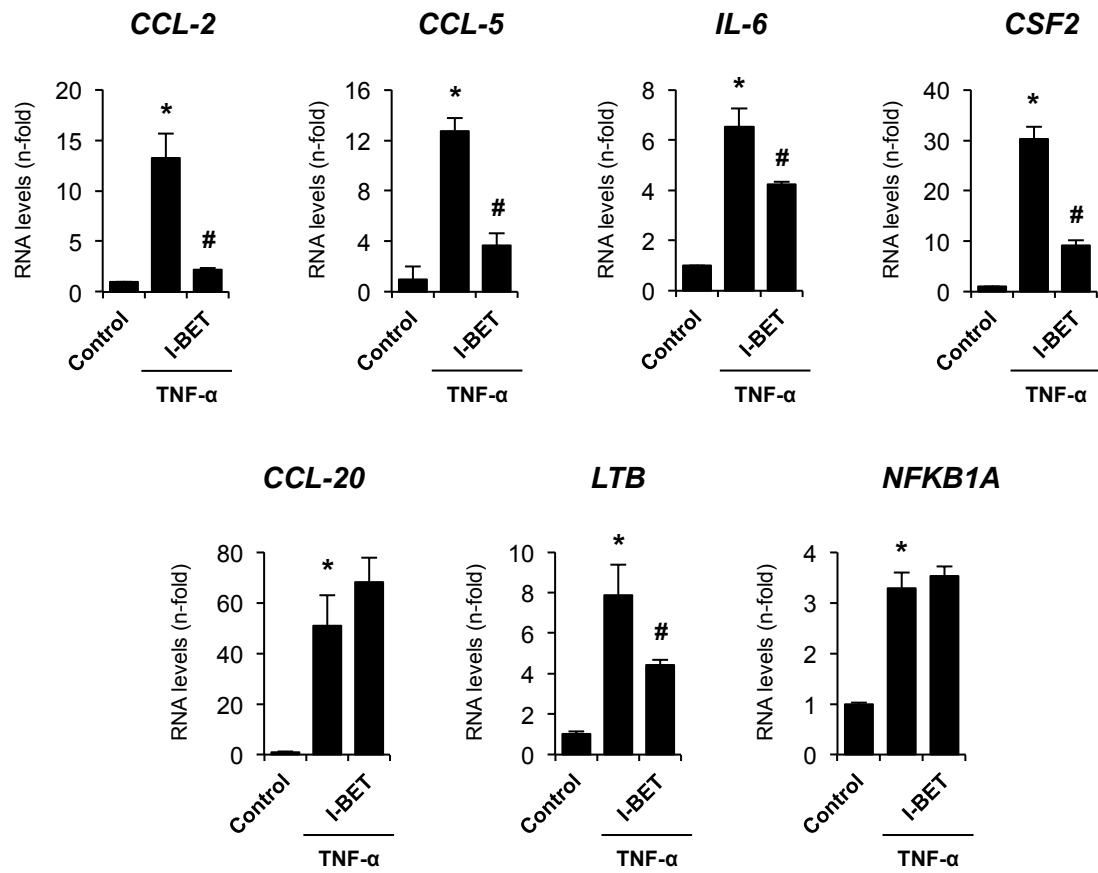

**Figure 2 Supplementary.** The BET inhibitor, I-BET 762, downregulates proinflammatory gene expression in cultured renal cells. Renal tubular epithelial cells (HK2 cell line) were preincubated with the BET inhibitor (I-BET 762) at 500 nM for 24 hour, and then cells were stimulated with TNF- $\alpha$  (5 ng/ml) for 3 hours. Gene expression was evaluated by real-time qPCR. Data are expressed as mean  $\pm$ SEM of 3 independent experiments. \* $p < 0.05$  vs. control (vehicle-treated cells). # $p < 0.05$  vs. TNF- $\alpha$  treated cells. .

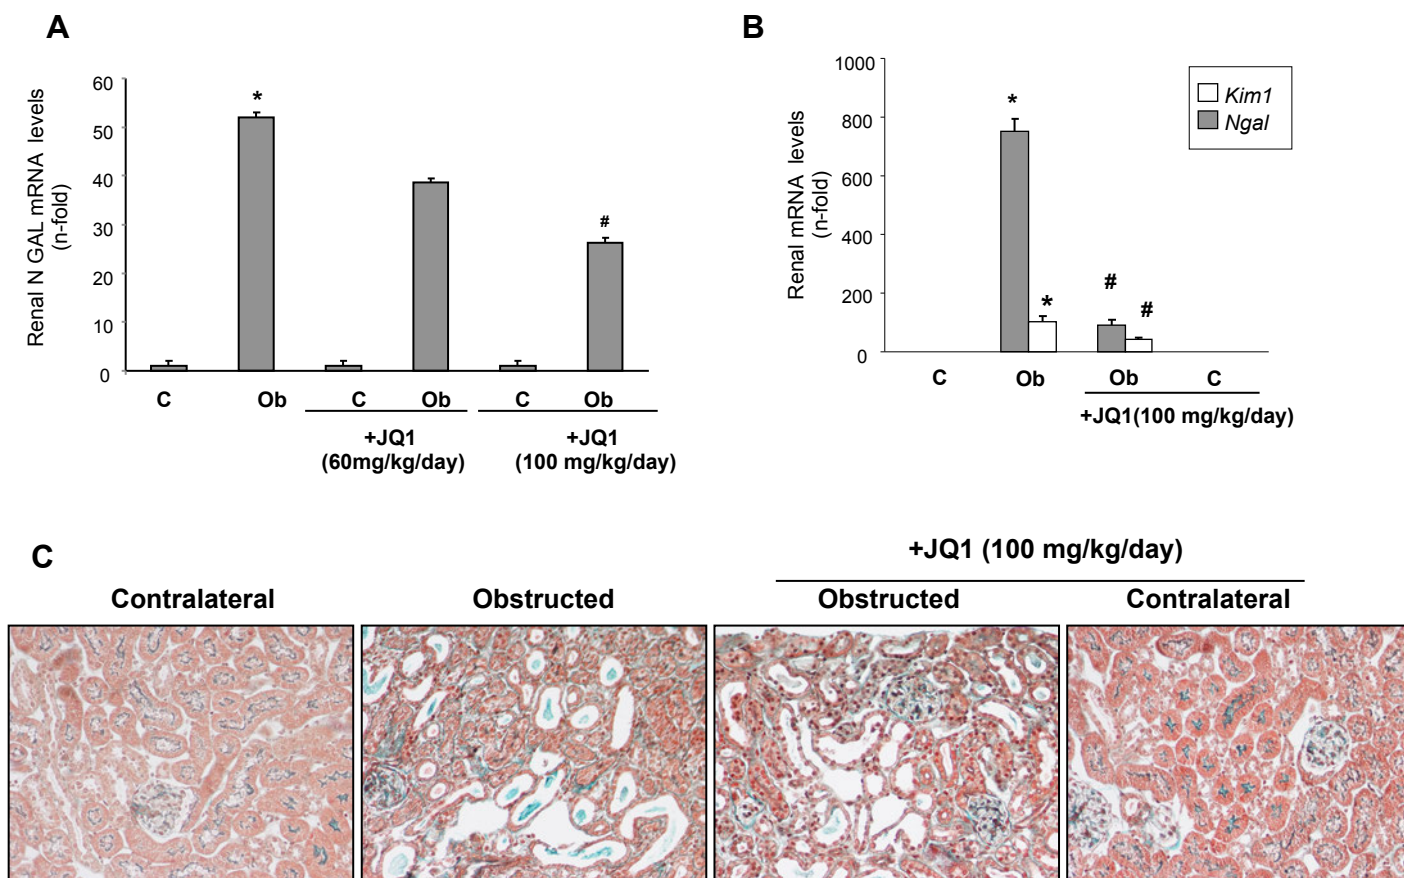

**Figure 3 Supplementary. JQ1 reduces renal damage in experimental models of unilateral ureteral obstruction.** UUO model was done in mice and studied after 2 (A) or 5 (B) days. Some mice were treated with JQ1 (60 or 100 mg/kg/day, as indicated) or vehicle (10% hydroxypropyl  $\beta$ -cyclodextrin), starting 24 hours before UUO. Whole kidney *Ngal* and *Kim-1* mRNA levels were evaluated by quantitative real-time PCR. Data are expressed as the mean $\pm$ SEM of 6-8 animals per group. \* $p$ <0.05 vs. contralateral (c); # $p$ <0.05 vs. vehicle-treated obstructed (ob) kidneys. C. Renal lesions evaluated by Masson's trichrome. This staining illustrate the main tubulointerstitial histological changes in the obstructed kidney (Obstructed) compared with the Contralateral kidney (Contralateral) and JQ1 treated mice. Tubular cell injury associated with tubule dilatation, inflammatory cell infiltrates and extracellular matrix accumulation. In mice treated with JQ1 (100 mg/kg/day) tubular cell injury diminished but tubule dilatation remained. Figures show a representative mice Magnification 200x.

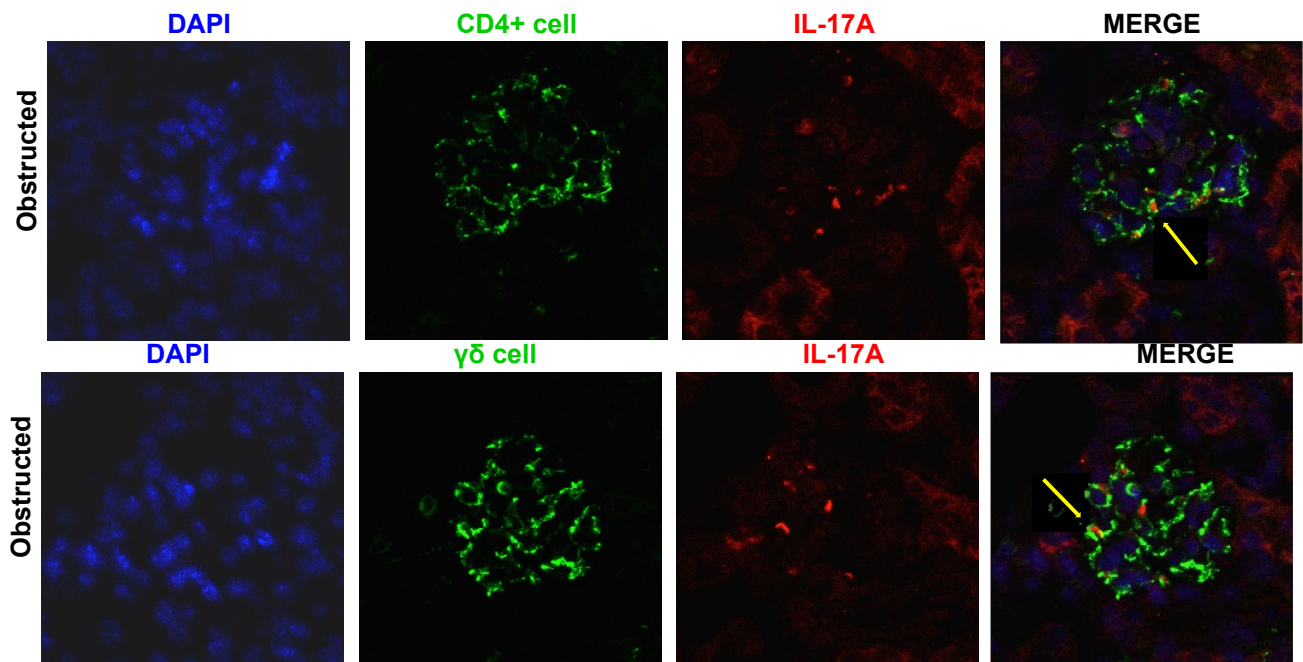

**Figure 4 Supplementary. JQ1 diminished the Th17 immune response in experimental renal damage.** Immunolocalization of IL-17A positive cells (red) in obstructed kidneys treated or not with JQ1. Immune cells were characterized using antibodies against CD4 or  $\gamma\delta$  lymphocytes. Double immunostaining of CD4+/IL17A+ (Th17 cells) or  $\gamma\delta$ /IL17A+ are shown in yellow (arrow). Nuclei are shown in blue. The figure shows a representative confocal image of 5-7 mice per group.
